# Supplementary material for: On the chemical fixation of supercritical carbon dioxide with epoxides catalyzed by ionic salts: an in situ FTIR and Raman study
Source: Royal Society of Chemistry journal article supplement (doi:10.1039/c2cy20784b), 2013-01-01
Supplement: c2cy20784b.pdf [file c2cy20784b.pdf]

**SUPPORTING INFORMATION for :**

**ON THE CHEMICAL FIXATION OF SUPERCRITICAL CARBON  
DIOXIDE WITH EPOXIDES CATALYZED BY IONIC SALTS:  
AN *IN-SITU* FTIR AND RAMAN STUDY**

Stéphanie FOLTRAN<sup>1</sup>, Jérôme ALSARRAF<sup>1</sup>, Frédéric ROBERT<sup>1</sup>, Yannick  
LANDAIS<sup>1</sup>, Eric CLOUTET<sup>2</sup>, Henri CRAMAIL<sup>2</sup>, Thierry TASSAING<sup>1</sup>

<sup>1</sup>*Institut des Sciences Moléculaires, UMR 5255 CNRS Université Bordeaux1, 351, Cours de  
la Libération, F-33405 Talence Cedex, France*

<sup>2</sup>*Laboratoire de Chimie des Polymères Organiques, Université de Bordeaux1, ENSCBP, 16,  
Avenue Pey-Berland, F-33607 Pessac Cedex, France*

CORRESPONDING AUTHOR: Thierry TASSAING

Tel: +33540002892 Fax: +33540008402

[t.tassaing@ism.u-bordeaux1.fr](mailto:t.tassaing@ism.u-bordeaux1.fr)

- **General procedure for the the synthesis of guanidinium halides:**

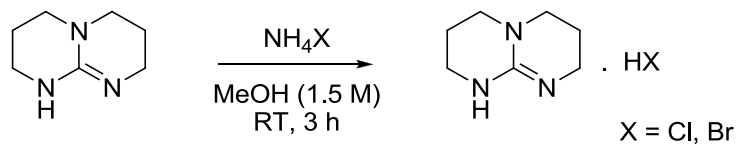

A reported procedure was followed<sup>[1]</sup>. To a suspension of dry ammonium halide (1.5 mmol) in dry methanol (1 mL) was added TBD (1.5 mmol). The mixture was stirred 3 h at room temperature. After evaporation of the solvent under reduced pressure, the resulting solid was dried overnight under vacuum to afford the corresponding guanidinium halide as a white solid.

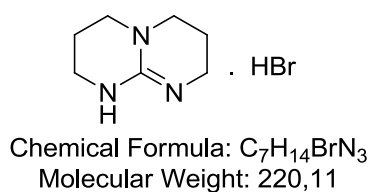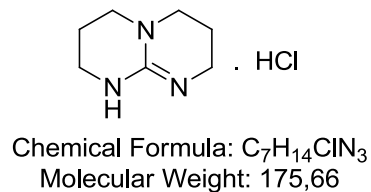

Reference:

<sup>[1]</sup> Yang, Z.-Z.; He, L.-N.; Miao, C.-X.; Chanfreau, S. *Adv. Synth. Catal.* **2010**, 352, 2233-2240.
